# Supplementary material for: Directed evolution unlocks oxygen reactivity for a nicotine-degrading flavoenzyme
Source: PubMed Central journal article supplement (PMC10611581; doi:10.1038/s41589-023-01426-y), 2023-09-28
Supplement: 41589_2023_1426_MOESM1_ESM.pdf [file 41589_2023_1426_MOESM1_ESM.pdf]

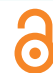

# Directed evolution unlocks oxygen reactivity for a nicotine-degrading flavoenzyme

---

In the format provided by the authors and unedited

---



# Directed evolution unlocks oxygen reactivity for a nicotine-degrading flavoenzyme

In the format provided by the authors and unedited

**Directed evolution unlocks oxygen reactivity for a nicotine degrading flavoenzyme**  
**Supplementary Information**

**Supplementary Table 1. Steady-state kinetic data of NicA2 wildtype and variants**

| NicA2 variant | Encoded mutations                                                   | $k_{\text{cat}}$ (s <sup>-1</sup> ) <sup>a</sup> | $K_M$ (μM) <sup>a</sup> | $k_{\text{cat}}/K_M$ (M <sup>-1</sup> s <sup>-1</sup> ) |
|---------------|---------------------------------------------------------------------|--------------------------------------------------|-------------------------|---------------------------------------------------------|
| WT            |                                                                     | $0.0066 \pm 2 \times 10^{-4}$                    | 0.114 <sup>b</sup>      | $5.4 \times 10^4$ <sup>b</sup>                          |
| 6             | H368R                                                               | $0.0837 \pm 0.008$                               | ND                      | ND                                                      |
| 15            | A107T, D130N, S192N, M265I, T397A                                   | $0.156 \pm 0.004$                                | $1.9 \pm 0.6$           | $8.2 \times 10^4$                                       |
| 16            | E249G, H368R                                                        | $0.166 \pm 0.004$                                | $1.1 \pm 0.4$           | $1.5 \times 10^5$                                       |
| 177           | G145A, S192I, Q359L, Q366R, S379N                                   | $0.17 \pm 0.01$                                  | $60 \pm 10$             | $2.7 \times 10^3$                                       |
| 235           | K49N, F93L, F104L, V127M, D130S, L132R, F174C, T319I, E454D         | $0.274 \pm 0.004$                                | $23 \pm 2$              | $1.2 \times 10^4$                                       |
| 254           | A107T, D130G, T267I, N462S                                          | $0.32 \pm 0.01$                                  | $15 \pm 2$              | $2.1 \times 10^4$                                       |
| 255           | F104L, G317D, H368R, L449V, N462S                                   | $0.239 \pm 0.004$                                | $1.1 \pm 0.3$           | $2.2 \times 10^5$                                       |
| 305           | F93L, F104L, V127M, D130S, L132R, S213T, T222S, A281T, L374M, M403I | $0.52 \pm 0.01$                                  | $140 \pm 10$            | $3.9 \times 10^3$                                       |
| 320           | F104L, A107T, D130S, T319I, L449V, N462S                            | $1.06 \pm 0.01$                                  | $6.3 \pm 0.4$           | $1.7 \times 10^5$                                       |
| 321           | F104L, A107T, S146I, G317D, H368R, L449V, N462S                     | $0.57 \pm 0.01$                                  | $0.9 \pm 0.3$           | $6.3 \times 10^5$                                       |
| 416           | T67A, F104L, A107T, D130S, K165R, N462S                             | $0.93 \pm 0.04$                                  | $8 \pm 2$               | $1.2 \times 10^5$                                       |
| 417           | G50D, F104L, A107T, D130S, F422L, N462H                             | $1.25 \pm 0.04$                                  | $7 \pm 1$               | $1.8 \times 10^5$                                       |
| 426           | G50D, F104L, A107T, D130S, T319I, L410M, L449V, N462S               | $1.04 \pm 0.02$                                  | $7.7 \pm 0.9$           | $1.4 \times 10^5$                                       |
| 427           | F104L, T280A, D294Y, T307S, G317D, N363S, H368R, S379N, N462S       | $0.65 \pm 0.02$                                  | $4.1 \pm 0.7$           | $1.6 \times 10^5$                                       |

Values reported with the 95% confidence interval from 3 technical replicates.

<sup>a</sup> The steady-state kinetic assays in this study were performed under ambient conditions, meaning that the  $k_{\text{cat}}$  and  $K_M$  values discussed here represent an *apparent*  $k_{\text{cat}}$  and  $K_M$  for nicotine turnover at an oxygen concentration of roughly 250 μM.

<sup>b</sup> Denotes values reported from Tararina et al.<sup>1</sup>

**Supplementary Table 2. HDX Data Summary.**

| <b>Data Set</b>                                                   | <b>Wildtype<br/>NicA2</b>                        | <b>NicA2 v321</b>                                                                                                                                                               | <b>Wildtype<br/>NicA2 + NMM</b>                  | <b>NicA2 v321 +<br/>NMM</b>                                                                                                                                              |
|-------------------------------------------------------------------|--------------------------------------------------|---------------------------------------------------------------------------------------------------------------------------------------------------------------------------------|--------------------------------------------------|--------------------------------------------------------------------------------------------------------------------------------------------------------------------------|
| <b>HDX reaction<br/>details</b>                                   | 10 mM<br>potassium<br>phosphate, pD<br>7.6, 4 °C | 10 mM<br>potassium<br>phosphate, pD<br>7.6, 4 °C                                                                                                                                | 10 mM<br>potassium<br>phosphate, pD<br>7.6, 4 °C | 10 mM<br>potassium<br>phosphate, pD<br>7.6, 4 °C                                                                                                                         |
| <b>HDX time<br/>course (min)</b>                                  | 0.5, 2, 5, 10 or 30 min                          |                                                                                                                                                                                 |                                                  |                                                                                                                                                                          |
| <b>HDX control<br/>samples</b>                                    | Maximally labeled controls were not performed.   |                                                                                                                                                                                 |                                                  |                                                                                                                                                                          |
| <b>Back-exchange</b>                                              | ~ 30 %                                           |                                                                                                                                                                                 |                                                  |                                                                                                                                                                          |
| <b># of Peptides</b>                                              | 105                                              | 81                                                                                                                                                                              | 105                                              | 81                                                                                                                                                                       |
| <b>Sequence coverage</b>                                          | 91 %                                             | 81 %                                                                                                                                                                            | 91 %                                             | 81 %                                                                                                                                                                     |
| <b>Average peptide<br/>length /<br/>Redundancy</b>                | 12.47/ 2.98                                      | 11.75 / 2.44                                                                                                                                                                    | 12.47/2.98                                       | 11.75 / 2.44                                                                                                                                                             |
| <b>Replicates<br/>(biological or<br/>technical)</b>               | 3 (technical)                                    | 3 (technical)                                                                                                                                                                   | 3 (technical)                                    | 3 (technical)                                                                                                                                                            |
| <b>Repeatability</b>                                              | 0.030 (average<br>SD)                            | 0.048 (average<br>SD)                                                                                                                                                           | 0.043 (average<br>SD)                            | 0.045 (average<br>SD)                                                                                                                                                    |
| <b>Significant<br/>differences in HDX<br/>(delta HDX &gt; XD)</b> | Reference                                        | Hybrid<br>Significance<br>test: 99% CI:<br>0.27 Da/ p-<br>value <-0.01. A<br>Welch's t-test<br>was used to<br>confirm the<br>significance<br>using a p-value<br>cutoff of 0.01. | Reference                                        | Hybrid<br>Significance test:<br>99% CI: 0.29 Da/<br>p-value <-0.01. A<br>Welch's t-test was<br>used to confirm<br>the significance<br>using a p-value<br>cutoff of 0.01. |

SD = standard deviation, CI = confidence interval.

**Supplementary Table 3. Statistics of X-ray structure determination.**

| <b>Data collection</b>                                                      |                                       |                                       |                                               |
|-----------------------------------------------------------------------------|---------------------------------------|---------------------------------------|-----------------------------------------------|
|                                                                             | <b>NicA2 v321-apo</b>                 | <b>NicA2 v321-NMM</b>                 | <b>WT-NMM</b>                                 |
| <b>Space group</b>                                                          | P43                                   | P43                                   | P2 <sub>1</sub> 2 <sub>1</sub> 2 <sub>1</sub> |
| <b>Cell dimensions</b><br><i>a, b, c</i> (Å)<br>$\alpha, \beta, \gamma$ (°) | 85.5, 85.5, 122.4<br>90.0, 90.0, 90.0 | 86.3, 86.3, 122.5<br>90.0, 90.0, 90.0 | 75.1, 86.7, 152.1<br>90.0, 90.0, 90.0         |
| <b>Resolution</b> (Å)                                                       | 42.76-2.10 (2.16-2.10)                | 32.64-1.90 (1.94-1.90)                | 57.18-2.50 (2.60-2.50)                        |
| <b>R<sub>merge</sub></b> (%)                                                | 7.6 (47.6)                            | 8.0 (46.5)                            | 10.3 (31.2)                                   |
| <b>R<sub>meas</sub></b> (%)                                                 | 8.2 (51.1)                            | 8.6 (49.9)                            | 11.1 (33.6)                                   |
| <b><i>I</i>/<math>\sigma</math>(<i>I</i>)</b>                               | 17.6 (4.3)                            | 15.9 (4.2)                            | 11.7 (5.2)                                    |
| <b>CC<sub>1/2</sub></b>                                                     | 0.907 (0.818)                         | 0.823 (0.796)                         | 0.894 (0.879)                                 |
| <b>Redundancy</b>                                                           | 7.6 (7.5)                             | 7.6 (7.5)                             | 7.0 (7.2)                                     |
| <b>Completeness (%)</b>                                                     | 100 (100)                             | 100 (100)                             | 97.2 (89.2)                                   |
| <b>Total/unique reflections</b>                                             | 388225/51280<br>(31529/4187)          | 536368/70427<br>(34209/4531)          | 239376/34120<br>(24554/3430)                  |
| <b>Refinement</b>                                                           |                                       |                                       |                                               |
| <b>R<sub>work</sub>, R<sub>free</sub></b> (%)                               | 15.1, 20.0                            | 14.0, 17.7                            | 16.4, 21.2                                    |
| <b>No. atoms</b>                                                            | 7279                                  | 7499                                  | 7149                                          |
| <b>Protein</b>                                                              | 6661                                  | 6704                                  | 6610                                          |
| <b>Ligand</b>                                                               | 172                                   | 192                                   | 275                                           |
| <b>Water</b>                                                                | 446                                   | 603                                   | 264                                           |
| <b>Rotamer outliers (%)</b>                                                 | 0.59                                  | 0.15                                  | 0.6                                           |
| <b>Clashscore</b>                                                           | 4.2                                   | 3.57                                  | 2.72                                          |
| <b>RMSD</b>                                                                 |                                       |                                       |                                               |
| <b>Bond lengths</b> (Å)                                                     | 0.012                                 | 0.016                                 | 0.004                                         |
| <b>Bond angles</b> (°)                                                      | 1.05                                  | 1.19                                  | 0.69                                          |
| <b>Average B factors</b> (Å <sup>2</sup> )                                  | 29.18                                 | 21.77                                 | 34.90                                         |
| <b>Wilson B-factor</b> (Å <sup>2</sup> )                                    | 26.80                                 | 20.07                                 | 31.88                                         |
| <b>Ramachandran statistics</b>                                              |                                       |                                       |                                               |
| <b>Favored regions (%)</b>                                                  | 97.56                                 | 98.49                                 | 97.33                                         |
| <b>Allowed regions (%)</b>                                                  | 2.44                                  | 1.51                                  | 2.44                                          |
| <b>Outliers (%)</b>                                                         | 0.00                                  | 0.00                                  | 0.23                                          |

Statistics for the highest-resolution shell are shown in parentheses.

**Supplementary Table 4. Primers used in this study.**

| <b>Primer name</b> | <b>Primer sequence (5' to 3')</b>                                                                                                                                                                           |
|--------------------|-------------------------------------------------------------------------------------------------------------------------------------------------------------------------------------------------------------|
| <b>P01</b>         | ACCCAGAAGACCAACCGTG                                                                                                                                                                                         |
| <b>P02</b>         | TTAGCTCAGCAGTTGTTTCACTTCACG                                                                                                                                                                                 |
| <b>P03</b>         | CGGGTCAAGAGATCGAGTTAGGCGGTGCGT                                                                                                                                                                              |
| <b>P04</b>         | ACGCACCGCCTAACTCGATCTCTTGACCCG                                                                                                                                                                              |
| <b>P05</b>         | GATCGAGTTCGGCGGTACGTGGGTTTCATTGG                                                                                                                                                                            |
| <b>P06</b>         | CCAATGAACCCACGTACCGCCGAACTCGATC                                                                                                                                                                             |
| <b>P07</b>         | CGGCCTGGGTGTGGTTGAAAGTCCGCTGACCAA                                                                                                                                                                           |
| <b>P08</b>         | TTGGTCAGCGGACTTTCAACCACACCCAGGCCG                                                                                                                                                                           |
| <b>P09</b>         | CTCGTTCGCTATAATCGCGGGTTTGCACCCAGTT                                                                                                                                                                          |
| <b>P10</b>         | AACTGGGTGCAAACCCGCGATTATAGCGACGAG                                                                                                                                                                           |
| <b>P11</b>         | GGCTGGCACGCGAGCATTGATGGTGCG                                                                                                                                                                                 |
| <b>P12</b>         | CGCACCATCAATGCTCGCGTGCCAGCC                                                                                                                                                                                 |
| <b>P13</b>         | GTCAAGAGATCGAGTTCGGCGGTACGTGG                                                                                                                                                                               |
| <b>P14</b>         | CCACGTACCGCCGAACTCGATCTCTTGAC                                                                                                                                                                               |
| <b>P15</b>         | ATCGAGCTCGGCGGTGCGTGGGTTTCATTG                                                                                                                                                                              |
| <b>P16</b>         | CAATGAACCCACGCACCGCCGAGCTCGAT                                                                                                                                                                               |
| <b>P17</b>         | CGGCCTGGGTGTGGTTGAAGATCCGCTGACCAA                                                                                                                                                                           |
| <b>P18</b>         | TTGGTCAGCGGATCTTCAACCACACCCAGGCCG                                                                                                                                                                           |
| <b>P19</b>         | TACAAACACATCGGCTTCACCCGGCGCTG                                                                                                                                                                               |
| <b>P20</b>         | CAGCGCCGGGTGAAGCCGATGTGTTTGTA                                                                                                                                                                               |
| <b>P21</b>         | CGGAGGGTTCGTATCTTGTGTTGCTGGTGCG                                                                                                                                                                             |
| <b>P22</b>         | CGCACCAAGCAAACAAGATACGACCCTCCG                                                                                                                                                                              |
| <b>P23</b>         | CGGCTGGCACGCGAATATTGATGGTGCTG                                                                                                                                                                               |
| <b>P24</b>         | CAGCACCATCAATATTTCGCGTGCCAGCCG                                                                                                                                                                              |
| <b>P25</b>         | GTGCCGCTGAACACCTAGAAACACATCGGCT                                                                                                                                                                             |
| <b>P26</b>         | AGCCGATGTGTTTCTAGGTGTTTCAGCGGCAC                                                                                                                                                                            |
| <b>P27</b>         | GCAAGGGTGCGAAACTGTAGGTTTCAGTGAAACAG                                                                                                                                                                         |
| <b>P28</b>         | CTGTTTCACGTGAACCTACAGTTTCGCACCCTTGC                                                                                                                                                                         |
| <b>P29</b>         | ATATAGGATCCATGGATGCCAACAGCCTGGCTGAAGCAAAGTGTGGCCAATC<br>GCGAGCTGGATAAATATGGCGTGAGCGACTTCTATAAACGCTTGATCAATAAAG<br>CTAAGACCGTGGAAGGCGTTGAAGCTCTGAACTTCATATTTTGGCTGCACTGC<br>CAAGCGGTGGCTTCGATTACGACGTGGTTGTG |
| <b>P30</b>         | GCGCGCCTCGAGTTAGCTCAGCAGTTG                                                                                                                                                                                 |

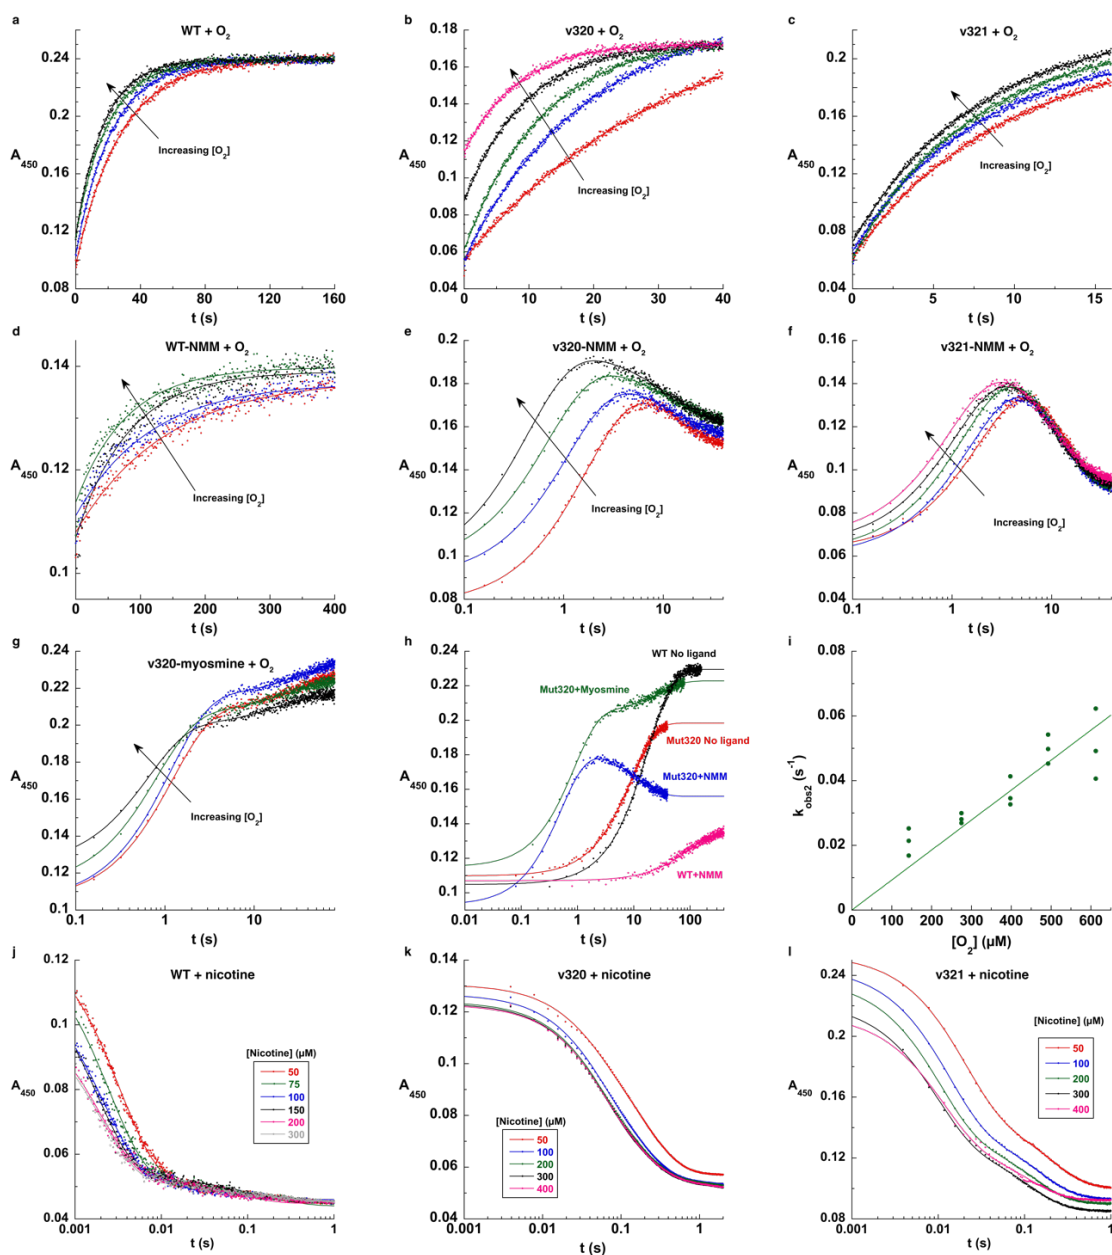

**Supplementary Figure 1. Raw traces of stopped flow reactions.** **a**, The reaction of reduced NicA2 wildtype with oxygen. **b**, The reaction of reduced NicA2 v320 with oxygen. **c**, The reaction of reduced NicA2 v321 with oxygen. **d**, The reaction of reduced NicA2 wildtype in the presence of 1 mM NMM with oxygen. **e**, The reaction of reduced NicA2 v320 in the presence of 1 mM NMM with oxygen. **f**, The reaction of reduced NicA2 v321 in the presence of 1 mM NMM with oxygen. **g**, The reaction of reduced NicA2 v320 in the presence of 1 mM myosmine with oxygen. **h**, Overlays of NicA2 under various conditions reacting with oxygen at 450  $\mu\text{M}$ . **i**, Plot of the  $k_{\text{obs}2}$  values for the second phase of oxidation for reduced NicA2 v320 in the presence of myosmine reacting with oxygen. The slope of the fitted line ( $93 \pm 45 \text{ M}^{-1}\text{s}^{-1}$ ) is comparable to that of ligand-free NicA2 v320 (**Table 1** of main text). **j**, The reaction of NicA2 wildtype with nicotine. **k**, The reaction of NicA2 v320 with nicotine. **l**, The reaction of NicA2 v321 with nicotine.

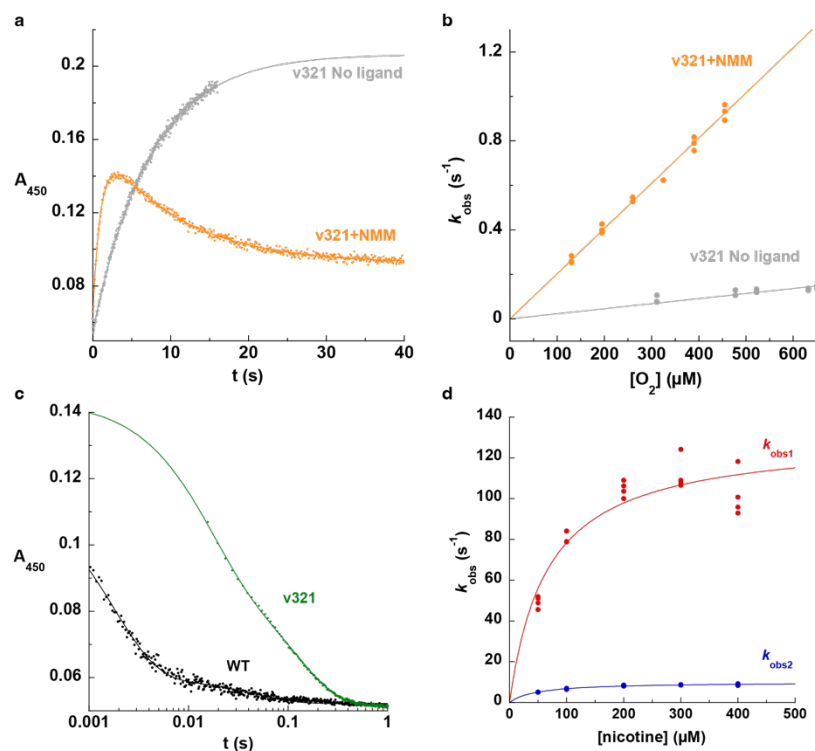

**Supplementary Figure 2. Stopped flow reactions of NicA2 v321.** **a**, Example traces for the stopped-flow reaction of reduced NicA2 v321 with O<sub>2</sub> under the described conditions. The decrease in absorbance that occurs after flavin oxidation for the NMM-bound trace is caused by an interaction between NMM and NicA2 containing oxidized FAD<sup>2</sup>. **b**,  $k_{obs}$  values for the first phase of oxidation are plotted against the concentration of O<sub>2</sub> and fit to a line. The slopes of these lines define the bimolecular rate constants for oxidation by O<sub>2</sub> and are presented for the various conditions in **Table 1** of the main text. **c**, Example traces for the stopped-flow reaction of oxidized NicA2 WT and v321 with nicotine. Note the logarithmic x-axis. **d**,  $k_{obs}$  values for the two phases observed in the reaction of NicA2 v321 with nicotine are plotted against the concentration of nicotine used in each experiment and then fit to a hyperbola. The resulting rate constants for reduction are presented in **Table 1** of the main text.



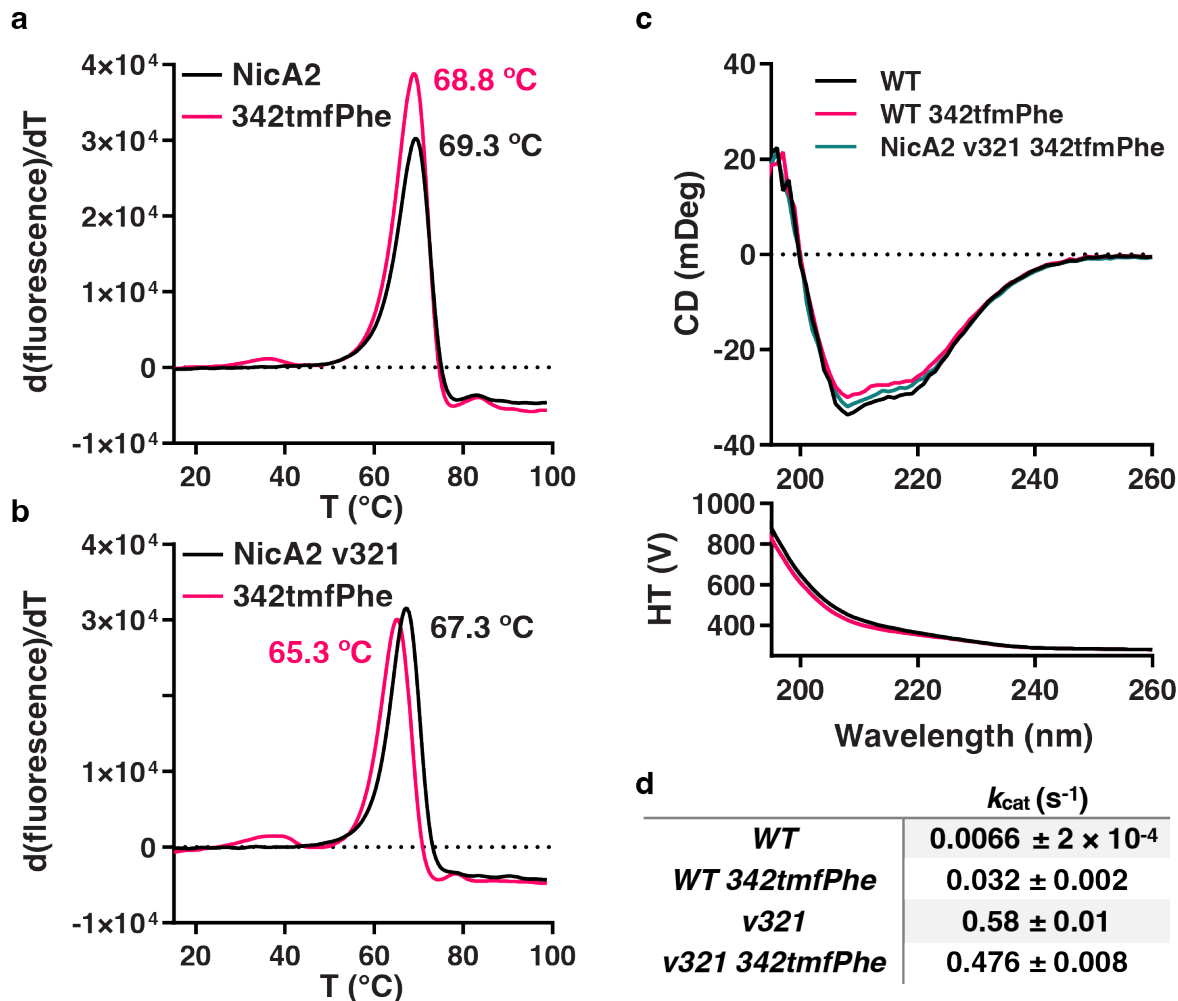

**Supplementary Figure 3. Qualities of NicA2 <sup>19</sup>F containing variants.** **a**, NicA2 wildtype and NicA2 wildtype with tmfPhe substituted at position 342 have a similar melting temperature. Traces represent an average of 3 replicates. **b**, NicA2 v321 and NicA2 v321 with tmfPhe substituted at position 342 have a slightly different, but still similar melting temperature. Traces represent an average of 3 replicates. **c**, Circular dichroism spectra of wildtype and the two <sup>19</sup>F containing constructs maintain secondary structure. **d**, Steady-state kinetic data for the reaction of NMR variants with nicotine. Values are reported with 95% confidence intervals.

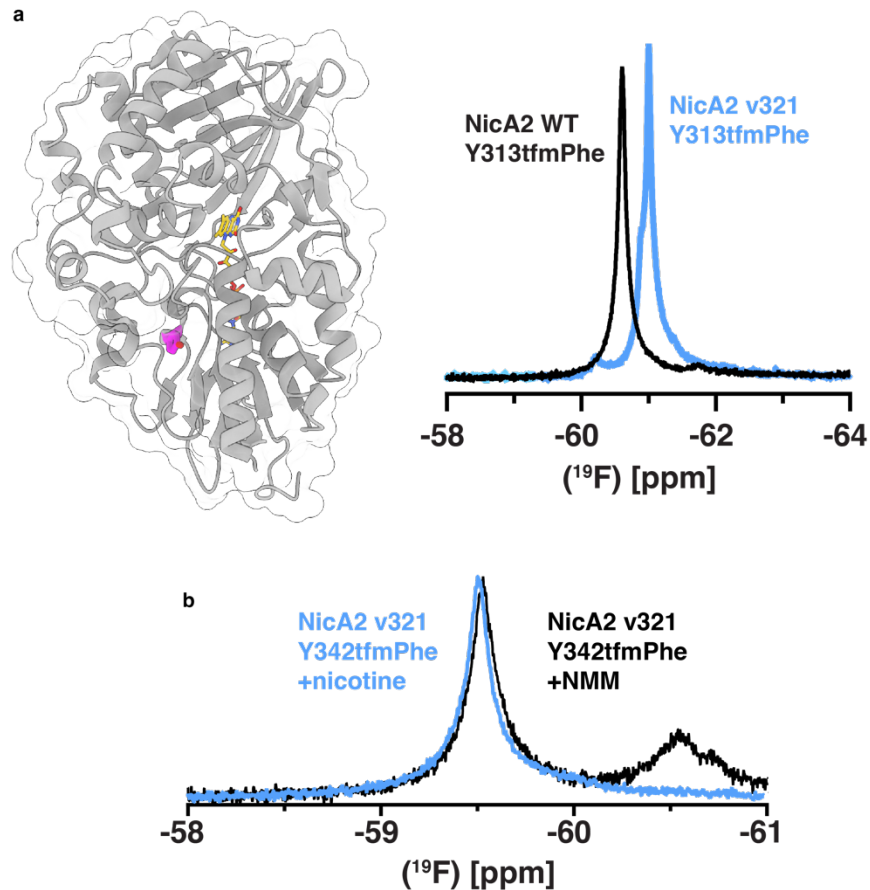

**Supplementary Figure 4. A tmfPhe substitution far from the tunnel region in NicA2 does not display conformational heterogeneity.** **a**, Y313 (magenta) was mutated to the amber stop codon, and tfmPhe incorporated into this position to serve as a probe for  $^{19}\text{F}$  NMR. This position was chosen because it is conservative substitution distant from the tunnel region and buried in the core of the flavin-binding domain. It should therefore be an independent readout about global protein dynamics that is not influenced by local tunnel dynamics. Displayed in the right panel are the  $^{19}\text{F}$  NMR spectra of the Y313tfmPhe substitution for wildtype and variant NicA2s, which are similar. **b**, Nicotine was titrated into NicA2 v321 Y342tmfPhe to achieve the reduced, NMM-bound state. NMM was also titrated into the oxidized enzyme. These major species of these spectra overlay closely, indicating that NMM-bound oxidized and reduced states are conformationally indistinguishable.

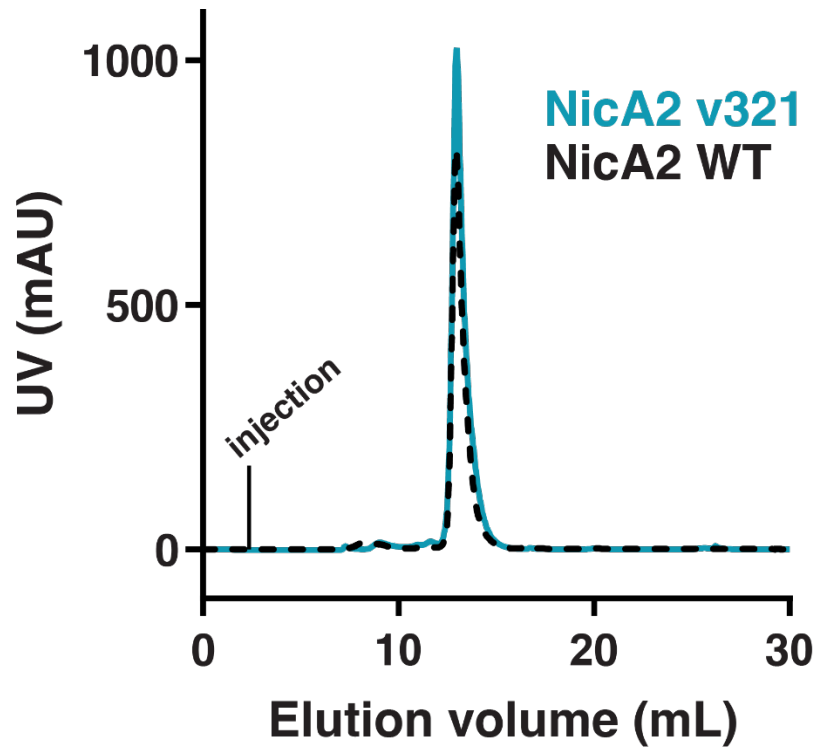

**Supplementary Figure 5. NicA2 wildtype and v321 have a similar elution profile in size exclusion chromatography.** NicA2 enzymes were prepared at NMR concentrations (100  $\mu\text{M}$ ). 200  $\mu\text{L}$  of each enzyme were injected onto a Superdex 200 10/300 GL column equilibrated in 40 mM HEPES pH 7.4, 100 mM NaCl, 10% (w/v) glycerol. An Äkta-FPLC system was used to maintain a flowrate of 0.2 mL  $\text{min}^{-1}$ , and absorbance of the sample monitored at 280 nm. The elution profile of NicA2 wildtype is displayed as a dashed black line, v321 is a solid cyan line.

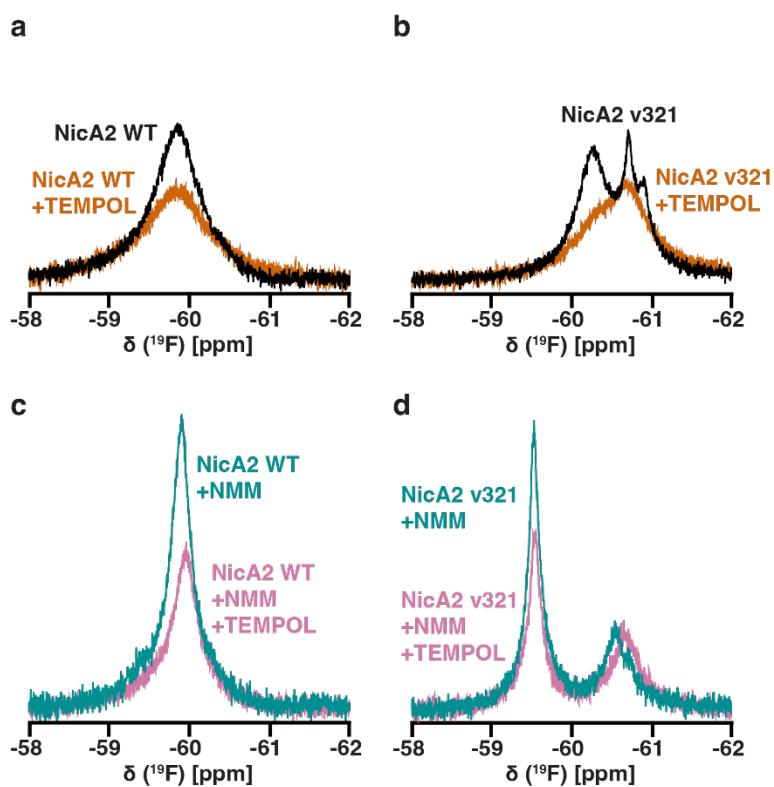

**Supplementary Figure 6. NicA2 enzymes upon addition of TEMPOL.** **a**, Scans were taken before and after TEMPOL was added to 8 mM end concentration in samples of NicA2 Y342tmfF wildtype or **b**, v321. **c**, The same experiment was repeated with 5 mM NMM included in samples of NicA2 wildtype and **d**, v321.

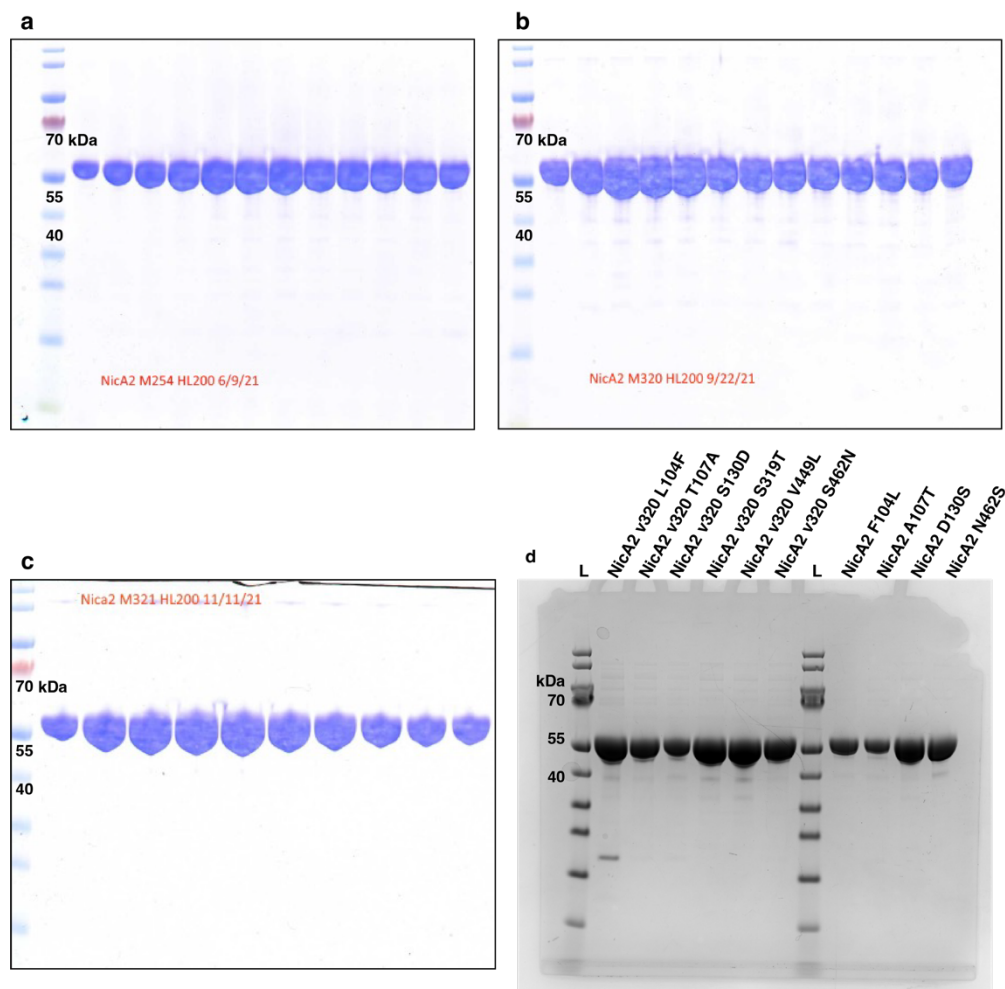

**Supplementary Figure 7. SDS-PAGE showing purity of NicA2 variants.** **a**, Fractions collected after size exclusion of NicA2 v254, all fractions were collected and combined. **b**, Fractions collected after size exclusion of NicA2 v320. **c**, Fractions collected after size exclusion of NicA2 v321. **d**, Purity of various NicA2 variants used for steady-state analyses in this study. All proteins were checked for purity using gel electrophoresis before use.

## References

1. Tararina, M. A. *et al.* Crystallography coupled with kinetic analysis provides mechanistic underpinnings of a nicotine-degrading enzyme. *Biochemistry* **57**, 3741–3751 (2018).
2. Dulchavsky, M., Clark, C. T., Bardwell, J. C. A. & Stull, F. A cytochrome c is the natural electron acceptor for nicotine oxidoreductase. *Nat. Chem. Biol.* (2021) doi:10.1038/s41589-020-00712-3.
